# Supplementary material for: Theoretical study of the ring opening of phosphirane and silirane: contrasting mechanisms of hydrogen migration †
Source: Royal Society of Chemistry journal article supplement (doi:10.1039/b009918j), 2001-01-01
Supplement: b009918j.doc [file b009918j.doc]

# Supplementary data

Optimized geometries at the MP2/ 6-311++G(d,p) level

Phosphirane **PR**

C

P,1,r1

C,2,r2,1,a2

H,1,r3,2,a3,3,t3,0

H,1,r4,2,a4,3,t4,0

H,2,r5,1,a5,3,t5,0

H,3,r6,1,a6,2,t6,0

H,3,r7,1,a7,2,t7,0

| r1 1.8668  r2 1.8668  r3 1.0851  r4 1.084  r5 1.4109  r6 1.0851  r7 1.084 | a2 47.2146  a3 114.8319  a4 117.2222  a5 94.5899  a6 117.3918  a7 117.9075 | t3 110.5463  t4 -110.4592  t5 92.0124  t6 106.8406  t7 -109.4784 |
| --- | --- | --- |

Transition Structure **PTS**

C

P,1,r1

C,1,r2,2,a2

H,1,r3,2,a3,3,t3,0

H,1,r4,2,a4,3,t4,0

H,2,r5,1,a5,3,t5,0

H,3,r6,1,a6,2,t6,0

H,3,r7,1,a7,2,t7,0

| r1 1.8573  r2 1.4203  r3 1.1381  r4 1.0876  r5 1.4197  r6 1.086  r7 1.0868 | a2 109.5286  a3 77.4967  a4 122.0638  a5 96.1924  a6 118.5352  a7 121.9608 | t3 101.5072  t4 -148.2325  t5 216.5279  t6 46.3884 |
| --- | --- | --- |

Vinylphosphine **PO**

C

P,1,r1

C,1,r2,2,a2

H,1,r3,3,a3,2,t3,0

H,2,r4,1,a4,3,t4,0

H,2,r5,1,a5,3,t5,0

H,3,r6,1,a6,2,t6,0

H,3,r7,1,a7,2,t7,0

| r1 1.8251  r2 1.3438  r3 1.0895  r4 1.4106  r5 1.4119  r6 1.0869  r7 1.0862 | a2 125.4771  a3 118.5852  a4 96.9189  a5 97.5614  a6 121.7213  a7 121.155 | t3 188.2552  t4 21.6167  t5 117.9761  t6 -7.6248  t7 173.6457 |
| --- | --- | --- |

Silirane **SiR**

C

Si,1,r1

C,2,r2,1,a2

H,1,r3,2,a3,3,t3,0

H,1,r3,2,a3,3,-t3,0

H,2,r5,1,a5,3,t5,0

H,2,r5,1,a5,3,-t5,0

H,3,r6,1,a6,2,t6,0

H,3,r6,1,a6,2,-t6,0

| r1=1.85653275  r2=1.85653426  r3=1.08682758  r5=1.46792325  r6=1.0868271 | a2=49.50307545  a3=119.17046482  a5=119.23069458  a6=115.97896295 | t3=107.16124663  t5=104.94942112  t6=111.86308738 |
| --- | --- | --- |

Transition Structure **SiTS1**

C

Si,1,r1

C,1,r2,2,a2

H,1,r3,2,a3,3,t3,0

H,1,r4,2,a4,3,t4,0

H,2,r5,1,a5,3,t5,0

H,2,r55,1,a55,3,t55,0

H,3,r6,1,a6,2,t6,0

H,3,r7,1,a7,2,t7,0

| r1 2.1468  r2 1.3481  r3 1.3608  r4 1.088  r5 1.4767  r55 1.4769  r6 1.0879  r7 1.0873 | a2 126.1092  a3 46.0459  a4 113.0817  a5 90.8507  a55 87.8436  a6 121.438  a7 121.3421 | t3 83.6237  t4 -176.6806  t5 40.6414  t55 -209.9678  t6 7.8785  t7 -170.0438 |
| --- | --- | --- |

Transition Structure **SiTS2**

C

Si,1,r1

C,1,r2,2,a2

H,2,r3,3,a3,1,t3,0

H,1,r4,2,a4,3,t4,0

H,1,r5,2,a5,3,t5,0

H,2,r55,1,a55,3,t55,0

H,3,r6,1,a6,2,t6,0

H,3,r7,1,a7,2,t7,0

| r1 1.9806  r2 1.4412  r3 1.5496  r4 1.0844  r5 1.0857  r55 1.5034  r6 1.0861  r7 1.0843 | a2 78.2446  a3 49.1038  a4 114.5792  a5 108.3771  a55 96.3203  a6 118.8828  a7 119.8574 | t3 156.9368  t4 115.4189  t5 -114.4557  t55 79.3841  t6 108.6097  t7 -98.4298 |
| --- | --- | --- |

Vinylsilane **SiP1**

0 1

C

Si,1,r1

C,1,r2,2,a2

H,1,r3,3,a3,2,t3,0

H,1,r3,3,a3,2,-t3,0

H,2,r4,1,a4,3,180.,0

H,3,r5,1,a5,2,180.,0

H,3,r6,1,a6,7,t6,0

H,3,r6,1,a6,7,-t6,0

| r1=1.9032  r2=1.5333  r3=1.1017  r4=1.5153  r5=1.0944  r6=1.0946 | a2=116.0758  a3=110.8155  a4=94.1375  a5=111.9576  a6=111.1433 | t3=122.51  t6=120.3655 |
| --- | --- | --- |

Ethylsilylene **SiP2**

C

Si,1,r1

C,1,r2,2,a2

H,1,r3,3,a3,2,180.,0

H,2,r7,1,a7,3,0.,0

H,2,r4,1,a4,5,t4,0

H,2,r4,1,a4,5,-t4,0

H,3,r5,1,a5,2,0.,0

H,3,r6,1,a6,2,180.,0

| r1=1.8681  r2=1.3474  r3=1.0905  r4=1.4782  r5=1.0879  r6=1.0877 | a2=122.733  a3=117.4412  a4=110.7965  a5=121.6351  a6=121.9775  a7=108.2955 | t4=120.0681 |
| --- | --- | --- |
